# Supplementary material
Source: Royal Society of Chemistry journal article supplement (doi:10.1039/d6cc00359a)
Supplement: d6cc00359a1.pdf [file d6cc00359a1.pdf]

## Supplementary Information

# A Fluorinated Zirconium Metal-Organic Cage-Based Supramolecular Framework for Efficient Separation of Methanol-to-Olefins (MTO)

## Products

Tao Yang<sup>†a</sup>, Zhiyuan Fan<sup>†a</sup>, Jingyang Zheng<sup>†a</sup>, Meng Zhang<sup>a</sup>, Tao Chen<sup>a</sup>, Yuqing Zhou<sup>a</sup>, Changjiang Li<sup>\*a</sup>, Yao Jiang<sup>\*b</sup>, and Lin-Bing Sun<sup>\*c</sup>

<sup>a</sup> Key Laboratory of Functional Membranes and Energy Materials and Huangshan Technology Innovation Center for Green Chemical Engineering and New Materials, College of Chemistry and Chemical Engineering, Huangshan University, Huangshan 245041, China;

<sup>b</sup> School of Chemistry and Chemical Engineering, Hefei University of Technology, Hefei 230009, China;

<sup>c</sup> State Key Laboratory of Materials-Oriented Chemical Engineering, Jiangsu National Synergetic Innovation Center for Advanced Material (SICAM), College of Chemical Engineering, Nanjing Tech University, Nanjing 211816, China.

\*Corresponding author. E-mail: 163licj@163.com; yjiang@hfut.edu.cn; lbsun@njtech.edu.cn.

## Experimental Details

### Chemicals

Bis(cyclopentadienyl)zirconium dichloride ( $\text{Cp}_2\text{ZrCl}_2$ ; Aldrich, 98%), tetrafluoroterephthalic acid (Adamas, 98%), *N, N*-dimethylacetamide (DMA; Aldrich, 99.5%), dichloromethane (DCM; Aldrich, 99.5%), and dimethyl sulfoxide- $d_6$  (DMSO- $d_6$ ; Adamas, 99.9%) were purchased from suppliers and used directly without any further purification. Deionized water was generated by a Milli-Q integral pure and ultrapure water purification system and used in all experiments.

### Materials synthesis

#### Synthesis of NUT-107

15 mg zirconocene dichloride and 5 mg tetrafluoroterephthalic acid were dissolved in 1 mL DMA in a glass vial by ultrasonic treatment and 150  $\mu\text{L}$  deionized water was added to the mixture, which was placed in an oven preheated to 60  $^\circ\text{C}$  for 4 h. After cooling, NUT-107 was collected as a white crystal, and after washing with DMA and DCM three times for further use.

### Characterization

Single crystals of NUT-107 were selected on a Bruker D8 VENTURE MetalJet PHOTON II diffractometer. The crystal was kept at 193.00 K during data collection. The structure was solved by direct methods and refined by full-matrix least-squares on  $F^2$  with anisotropic displacement using the SHELXTL software package.<sup>1</sup> Non-hydrogen atoms were refined with anisotropic displacement parameters during the final refinement cycles. Hydrogen atoms were placed in calculated positions with isotropic displacement parameters set to  $1.2 \times U_{\text{eq}}$  of the attached atom. The content of the voids was partially recognizable as DMA and  $\text{H}_2\text{O}$  molecules, but mostly highly disordered. Attempts to include solvent molecules in the structural model yielded less than satisfactory results. The data were thus instead corrected for the contribution of the solvate molecules to the electron density using back Fourier transform methods as implemented in the Squeeze algorithm of the Platon program package.<sup>2</sup> The details for

data collection and refinement are included in the CIF file in the Tables S1-S3. CCDC 2524019 contains the supplementary crystallographic data for this paper. These data can be obtained free of charge from the Cambridge Crystallographic Data Centre (<https://www.ccdc.cam.ac.uk/>). Powder X-ray diffraction (PXRD) patterns of the materials were recorded with an X-ray diffractometer (Japan Rigaku D/MAX- $\gamma$ A) using Cu K $\alpha$  radiation at 40 kV and 100 mA. High-resolution mass spectrometry (HR-MS) analysis was performed using a Thermo Scientific Q Exactive hybrid quadrupole-Orbitrap mass spectrometer from the United States. Scanning electron microscopy (SEM), corresponding elemental mapping analysis, and energy-dispersive X-ray spectroscopy (EDS) analysis were performed using a Hitachi TM 3000 electron microscope operated at 2 kV.  $^1\text{H}$  nuclear magnetic resonance (NMR) spectra were recorded on a Bruker AVANCE-400 MHz instrument. Fourier transform infrared (FT-IR) spectra of the samples diluted with KBr were carried out on a ThermoFisher Nicolet iS10 spectrometer. X-ray photoelectron spectroscopy (XPS) was tested through a Thermo Scientific ESCALAB 250Xi spectrometer. The thermogravimetric analysis (TGA) curve was obtained by use of a thermobalance (STA-499C, NETZSCH). The sample was heated from room temperature to 800 °C with the heating rate 10 °C $\cdot$ min $^{-1}$  under a flow of N $_2$  (10 mL $\cdot$ min $^{-1}$ ).

### **Adsorption tests**

C $_3$ H $_6$  and C $_2$ H $_4$  adsorption isotherms were collected on an ASAP 2020 analyzer. Before each measurement, the sample was degassed under a vacuum line of ASAP 2020 at 353 K for 4 h to completely remove the guest molecules in the pores of NUT-107 to be tested. Ultra-high purity grades C $_3$ H $_6$  (99.99%) and C $_2$ H $_4$  (99.99%) were used for gas adsorption measurements. The N $_2$  adsorption-desorption isotherms were measured at 77 K using the automatic multi-station-specific surface, micropore, and mesoporous pore analyzer belcorp-max of Microtracbel Company. The samples were degassed at 353 K for 4 h before analysis. The Brunauer-Emmett-Teller (BET) surface area was calculated using adsorption data in a relative pressure ranging from 0.01 to 0.10. The total pore volume was determined from the amount adsorbed at a relative pressure of

0.99. The pore diameter was calculated from the adsorption branch using the non-local density functional theory method. To investigate the adsorption selectivity of C<sub>3</sub>H<sub>6</sub> and C<sub>2</sub>H<sub>4</sub> on the sample of NUT-107, the selectivity is defined as:

$$S = \frac{x_1 / y_1}{x_2 / y_2}$$

where  $x_1$  and  $y_1$  ( $x_2$  and  $y_2$ ) are the molar fractions of component 1 (component 2) in the adsorbed and bulk phases, respectively. The ideal adsorption solution theory (IAST) of Myers has been reported to predict binary gas mixture adsorption in porous materials accurately,<sup>3</sup> and the single-site Langmuir-Freundlich equation (LF) model was chosen to fit the adsorption isotherms, and then IAST was utilized to estimate the C<sub>3</sub>H<sub>6</sub> and C<sub>2</sub>H<sub>4</sub> selectivity of the adsorbent.

### Calculation of heat of adsorption ( $Q_{st}$ )

The  $Q_{st}$  is based on the adsorption isotherm data of the adsorbent on the gas at different temperatures. According to the Virial equation:

$$\ln P = \ln N + \left(\frac{1}{T}\right) \sum_{i=0}^m a_i \times N^i + \sum_{j=0}^n b_j \times N^j$$

$$Q_{st} = -R \times \sum_{i=0}^m a_i \times N^i$$

Where  $P$  is the pressure (kPa);  $N$  is the adsorption amount (mmol·g<sup>-1</sup>);  $T$  is the adsorption temperature;  $R$  is ideal gas constant (8.314 J·mol<sup>-1</sup>·K<sup>-1</sup>);  $m$  and  $n$  are the number of  $a$  and  $b$  parameters, respectively.

### Separation potential

The separation effect of different adsorbents can be evaluated by comparing the separation potential directly.<sup>4, 5</sup>

$$\Delta q = q_{C_3H_6} \frac{y_{C_2H_4}}{y_{C_3H_6}} - q_{C_2H_4}$$

where  $q_{C_3H_6}$  and  $q_{C_2H_4}$  are C<sub>3</sub>H<sub>6</sub> and C<sub>2</sub>H<sub>4</sub> adsorption in the mixture, respectively. For a 50/50 mixture, formula can be simplified as

$$\Delta q = q_{C_3H_6} - q_{C_2H_4}$$

The physical significance of  $\Delta q$  is that it represents the maximum amount of pure  $C_3H_6$  that can be recovered during the adsorption phase of fixed-bed separation.

### **Dynamic breakthrough test**

The samples after several washes were loaded into quartz tubes of size  $\varnothing 4 \text{ mm} \times 150 \text{ mm}$  and activated in a vacuum oven at  $60 \text{ }^\circ\text{C}$  for 4 hours. He was used as a carrier gas to purge the line, and the  $C_3H_6/C_2H_4$  (50:50, v: v) gas mixtures were flow controlled by a mass flow meter. The flow rate was adjusted to  $2.5 \text{ mL} \cdot \text{min}^{-1}$  during testing. The gas at the outlet of the adsorption column is continuously monitored using a thermal conductivity detector (TCD) and a flame ionization detector (FID).

### **Methodology**

Density functional theory (DFT) calculations were performed to investigate the adsorption behavior of  $C_2H_4/C_3H_6$  molecules on the NUT-107 using the *Quantum ESPRESSO* package.<sup>6, 7</sup> based on the pseudopotential plane-wave (PPW) method. An ultra-soft pseudopotential and a plane wave basis set were used in the GGA-type PBE-D2 functional for the relaxation.<sup>8, 9</sup> The pseudopotentials for C, H, O, F, Zr, and Cl were taken from the Quantum ESPRESSO pseudopotential library (<https://www.quantum-espresso.org/pseudopotentials>). All atomic structures were fully relaxed, with all atomic positions allowed to relax during geometry optimizations. Brillouin-zone sampling was performed using Monkhorst-Pack k-point grids with a reciprocal-space spacing of approximately  $0.04 \text{ \AA}^{-1}$ .<sup>10, 11</sup> A kinetic energy cutoff of 50 Ry. As the relaxation proceeded, the atomic positions and lattice vector were simultaneously modified until the residual forces and energy were less than  $10^{-4}$  Ry/Bohrs and  $10^{-5}$  Ry, respectively.

All grand canonical Monte Carlo (GCMC) computations were carried out by the open-source software package RASPA.<sup>12</sup> The Lennard-Jones potential was used with the applied universal force field (UFF) for the NUT-107 adsorbent atoms and with the Transferable Potentials for Phase Equilibria (TraPPE) force field for adsorbate molecule atoms.<sup>13, 14</sup> The Lorentz-Berthelot rule was set to generate the interaction

parameters between NUT-107 and adsorbate molecules, and the cut-off distance was set as 12 Å.<sup>15</sup> Before conducting uptake simulation, NUT-107 was set as a rigid 1×1×1 cell and exported as a charged structure from charge equilibration ( $Q_{eq}$ ) first. The charged structure was then used to generate the uptake isotherm, isosteric heat at zero coverage ( $Q_{st}$ ), preferable binding site (minimization) and density plot of adsorption with ethylene ( $C_2H_4$ ) and propylene ( $C_3H_6$ ) molecules, respectively. As for the uptake isotherm simulation, the simulated pressure was set to range from 0 bar to 1 bar with an interval of 0.1 bar. For each pressure point, the simulation input was set as 273 K, and a total of  $1.0 \times 10^5$  cycles Monte Carlo moves were set equally with the probabilities for adsorbate translation, rotation, reinsertion, and swap moves 0.5, 0.5, 0.5 and 1.0. As for the  $Q_{st}$  calculation, the simulated pressure was set to 0 bar and only the Monte Carlo moves were set only with the widom-particle insertion.<sup>16</sup> Next for the minimization process, the Baker minimization method was employed using the eigenvalues/vectors to find a true minimum where all eigenvalues are positive.<sup>17</sup> Finally, the density plot and minimization results were plotted via iRASPA.<sup>18</sup> The detailed parameters of the force field for both NUT-107 and molecules are shown in Table S6.

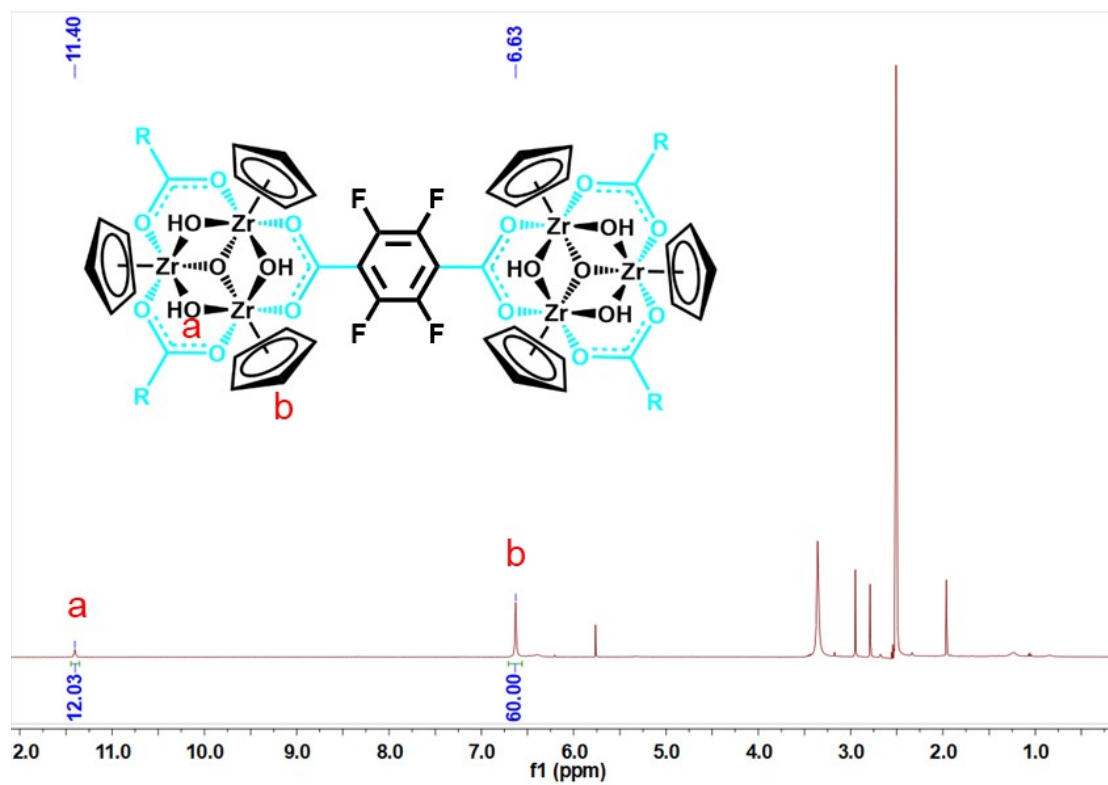

**Fig. S1**  $^1\text{H}$  NMR spectrum of NUT-107 in  $\text{DMSO-}d_6$ .

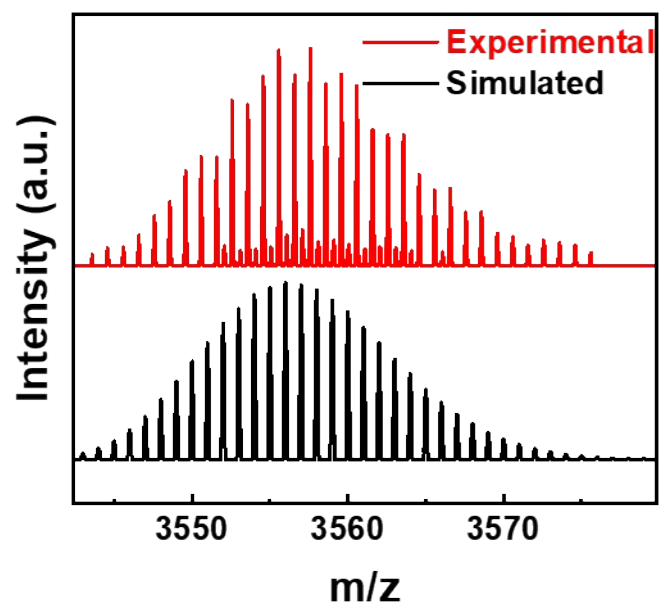

**Fig. S2** The experimental and simulated isotope patterns of +1 charge state peaks are attributed to the tetrahedral cage of NUT-107.

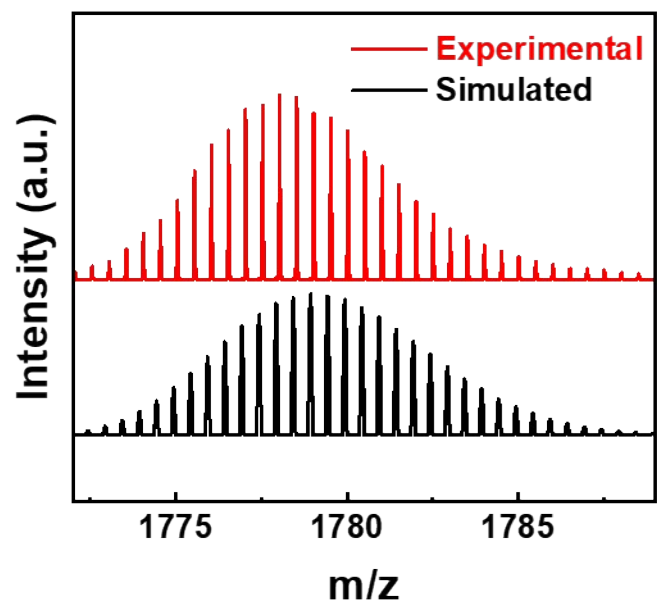

**Fig. S3** The experimental and simulated isotope patterns of +2 charge state peaks are attributed to the tetrahedral cage of NUT-107.

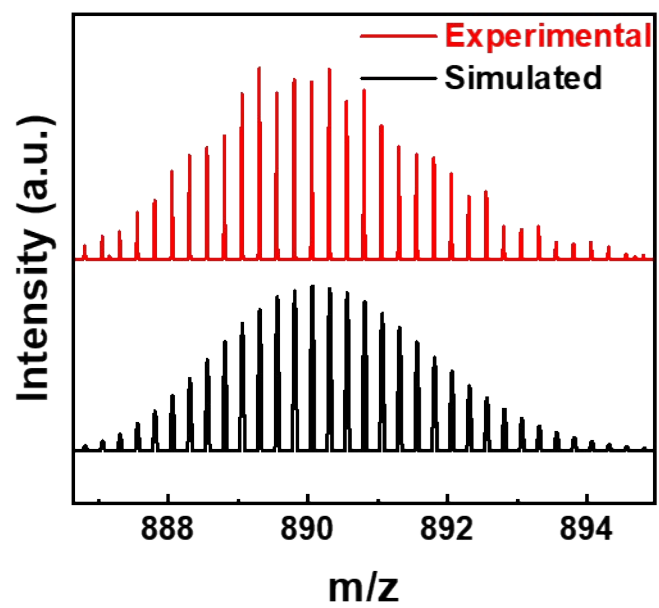

**Fig. S4** The experimental and simulated isotope patterns of +4 charge state peaks are attributed to the tetrahedral cage of NUT-107.

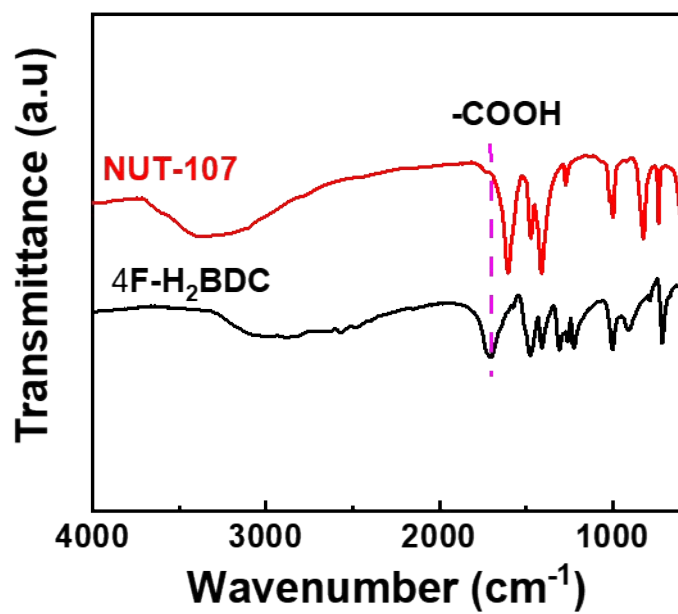

Fig. S5 FT-IR spectra of 4F-H<sub>2</sub>BDC and NUT-107.

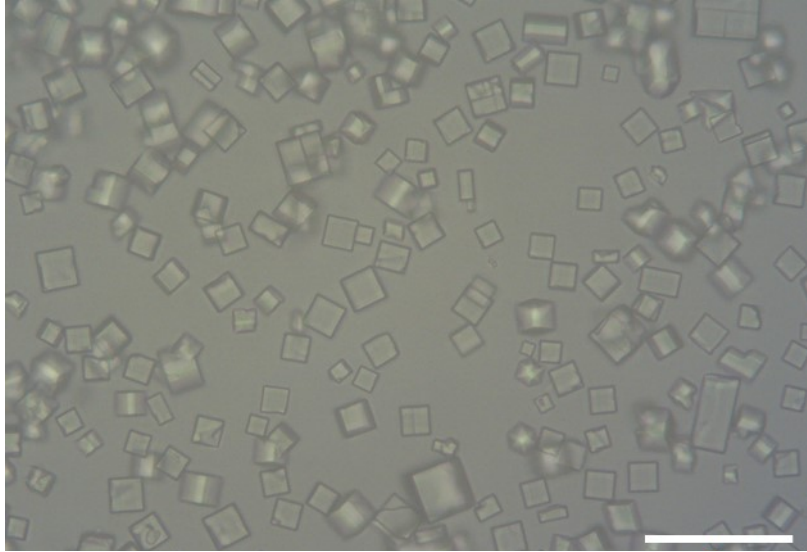

**Fig. S6** The optical microscope of the NUT-107 (scale bar 50  $\mu\text{m}$ ).

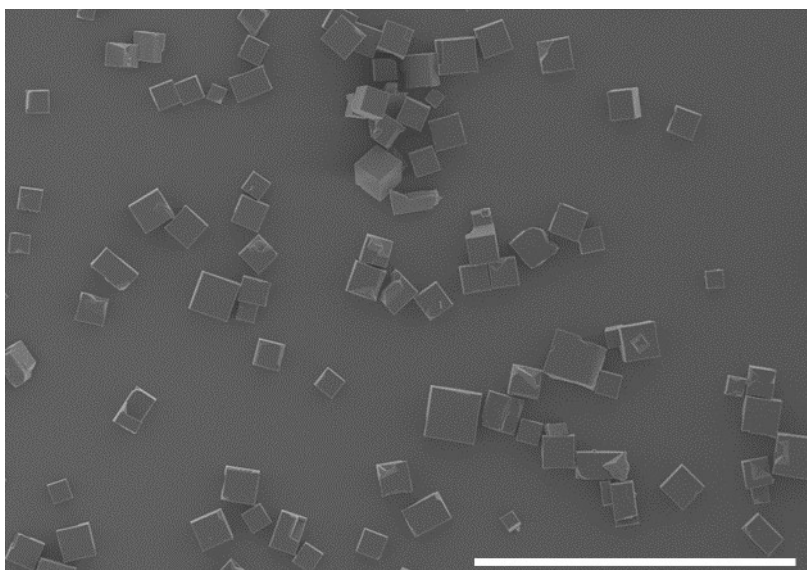

**Fig. S7** SEM images of NUT-107.

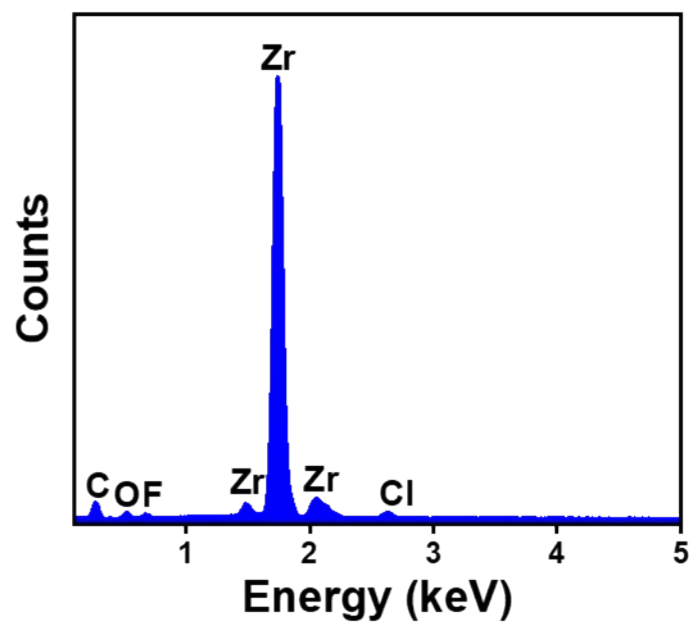

**Fig. S8** EDX spectrum of the sample NUT-107.

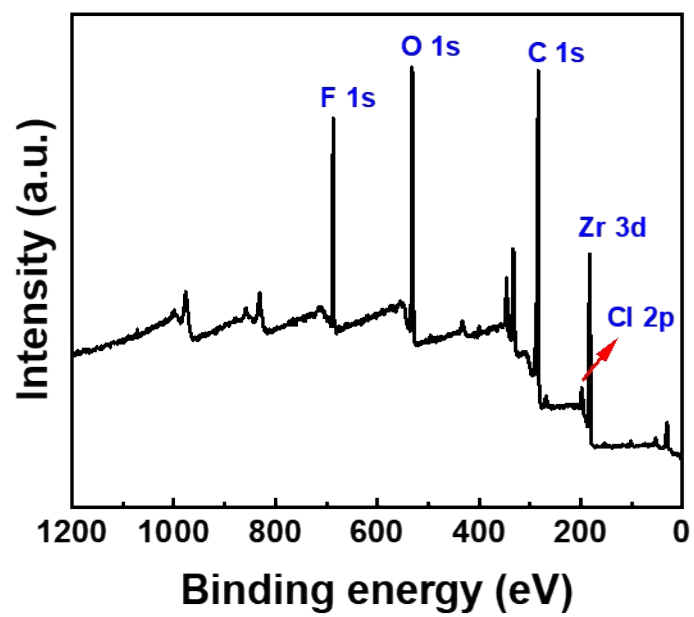

Fig. S9 XPS survey spectrum of NUT-107.

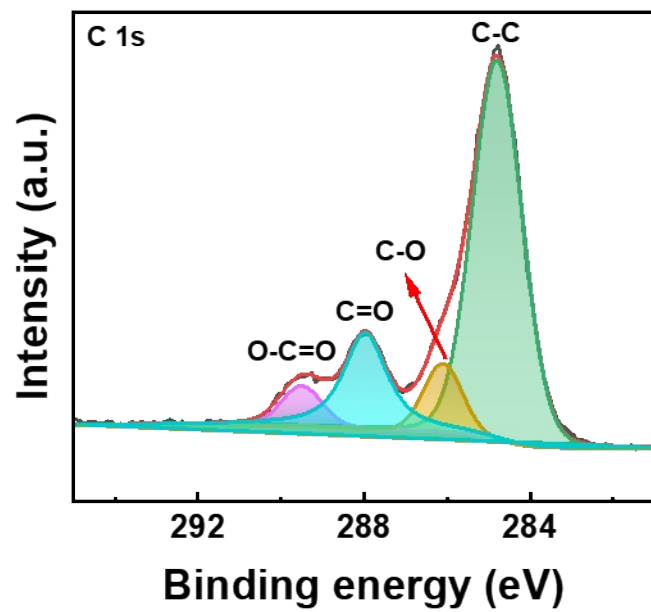

Fig. S10 XPS spectrum of C elements of NUT-107.

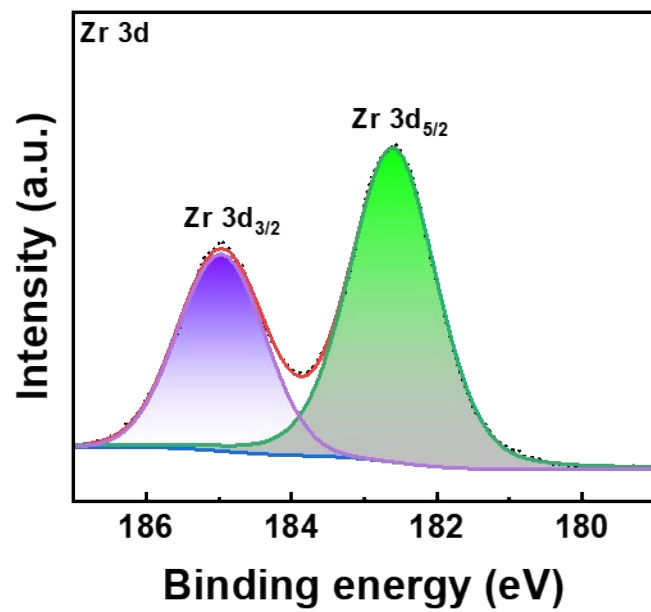

Fig. S11 XPS spectrum of Zr elements of NUT-107.

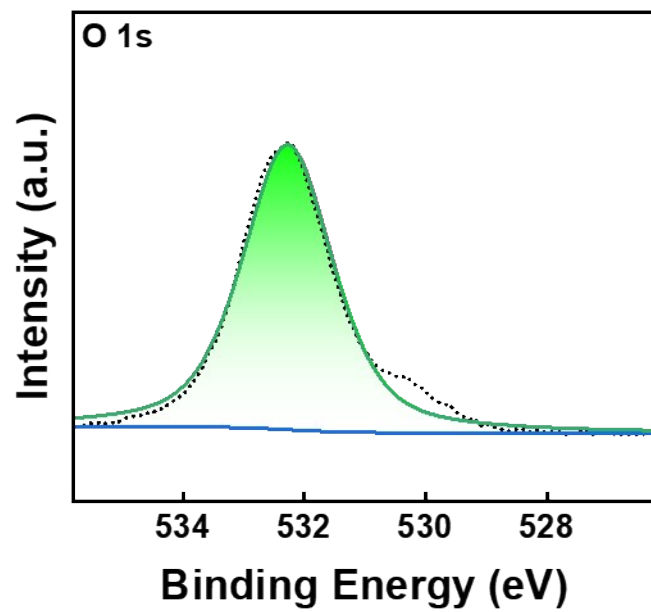

Fig. S12 XPS spectrum of O elements of NUT-107.

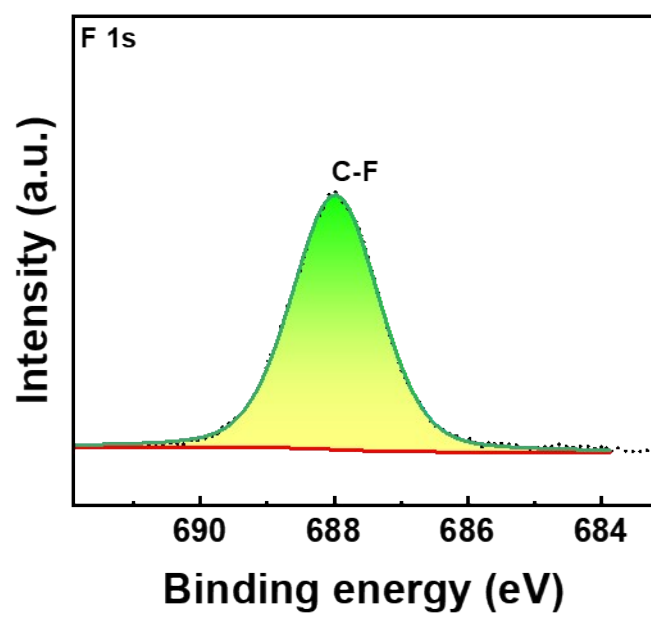

Fig. S13 XPS spectrum of F elements of NUT-107.

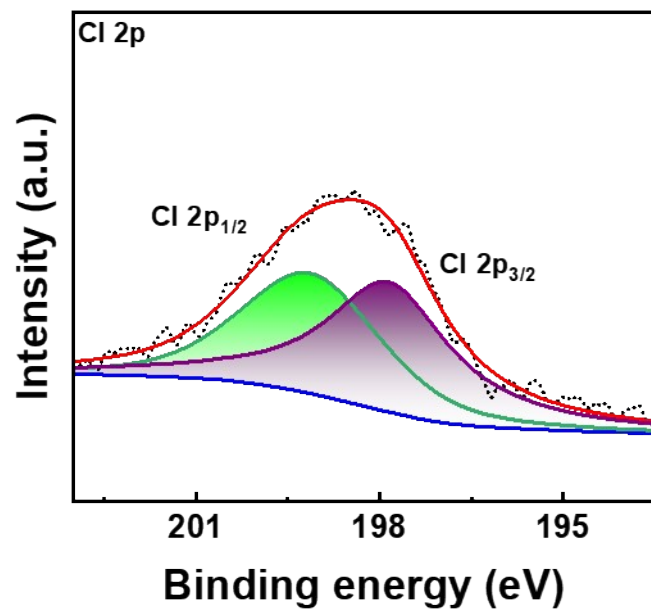

Fig. S14 XPS spectrum of Cl elements of NUT-107.

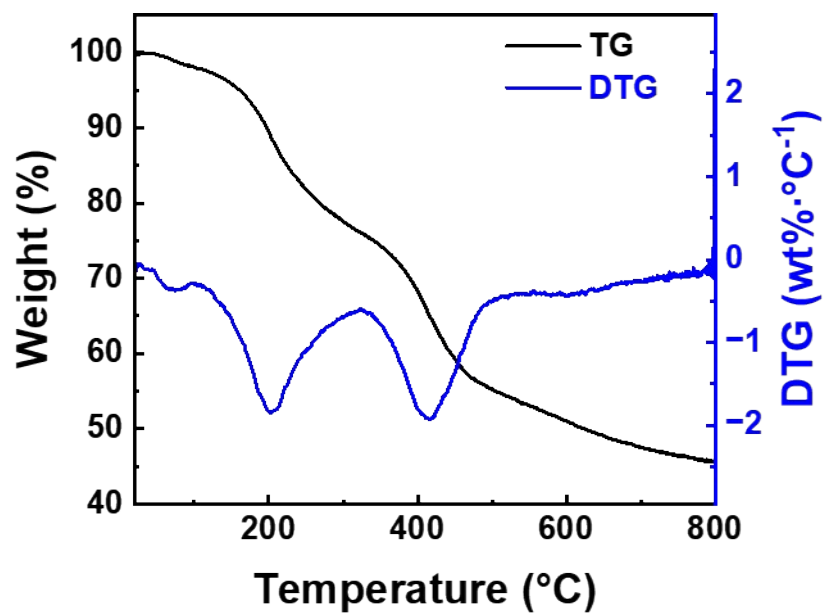

Fig. S15 TGA and DTG curves of the NUT-107.

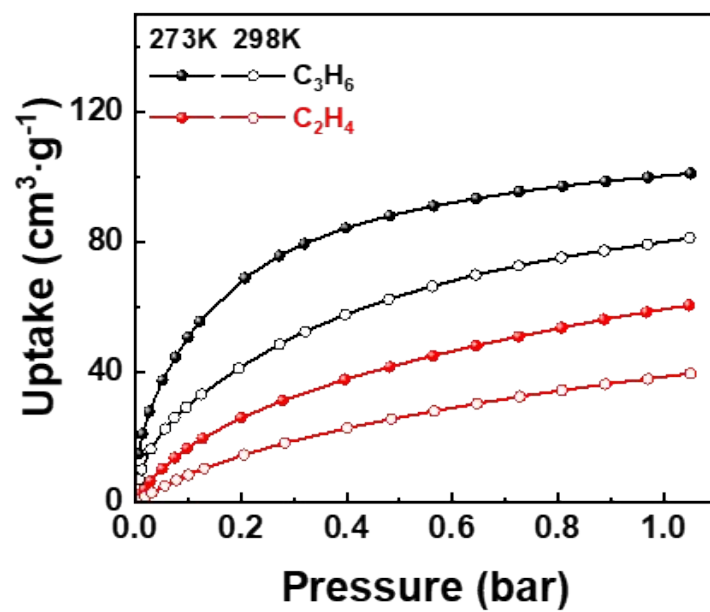

**Fig. S16** The uptake for C<sub>3</sub>H<sub>6</sub>/C<sub>2</sub>H<sub>4</sub> at 273/298 K for a non-fluorinated supramolecular framework.

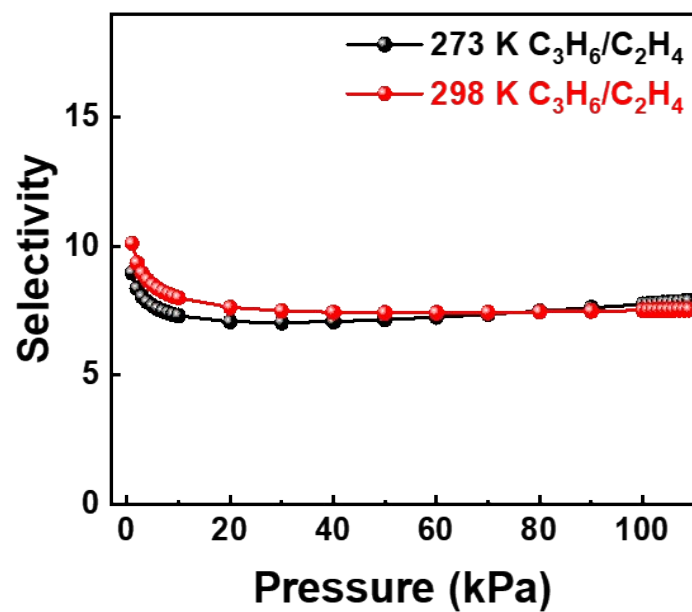

Fig. S17 IAST selectivity for C<sub>3</sub>H<sub>6</sub>/C<sub>2</sub>H<sub>4</sub> at 273 and 298 K for NUT-107.

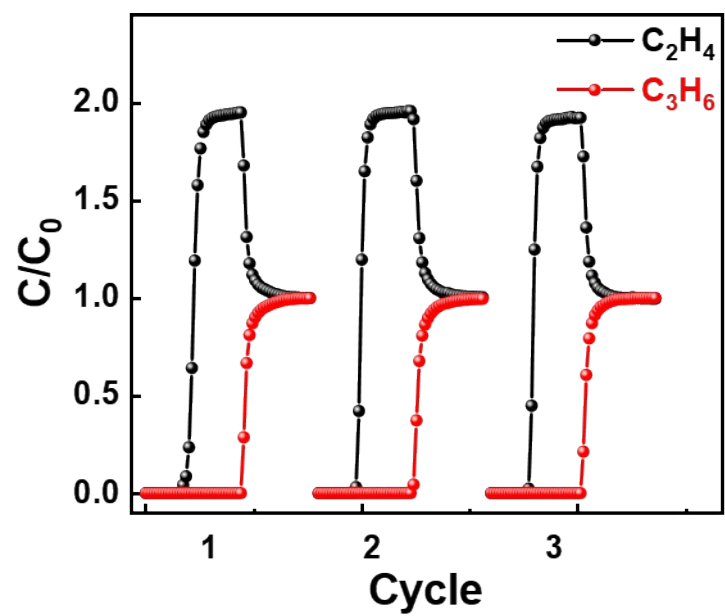

**Fig. S18** Breakthrough cycle curves of C<sub>2</sub>H<sub>4</sub>/C<sub>3</sub>H<sub>6</sub> (50:50, v: v) mixtures on NUT-107 at 1.0 bar and 273 K.

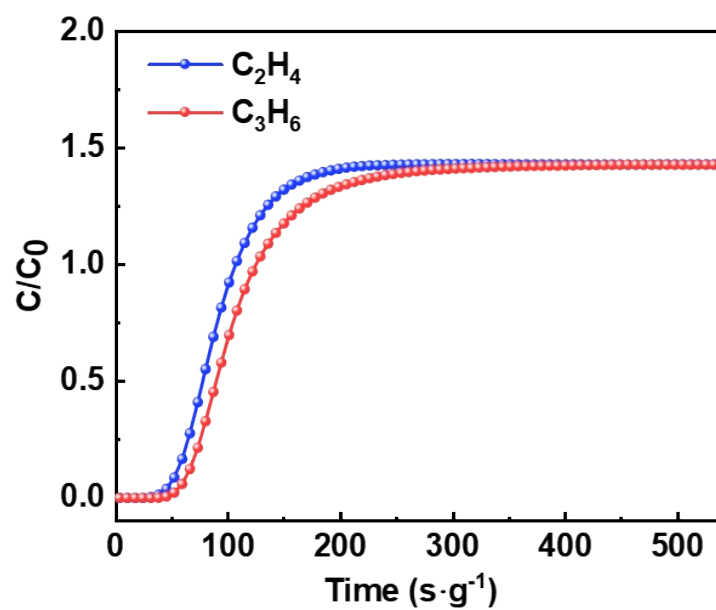

**Fig. S19** Breakthrough of C<sub>2</sub>H<sub>4</sub>/C<sub>3</sub>H<sub>6</sub> (50:50, v:v) mixtures on NUT-107 at 40% relative humidity conditions.

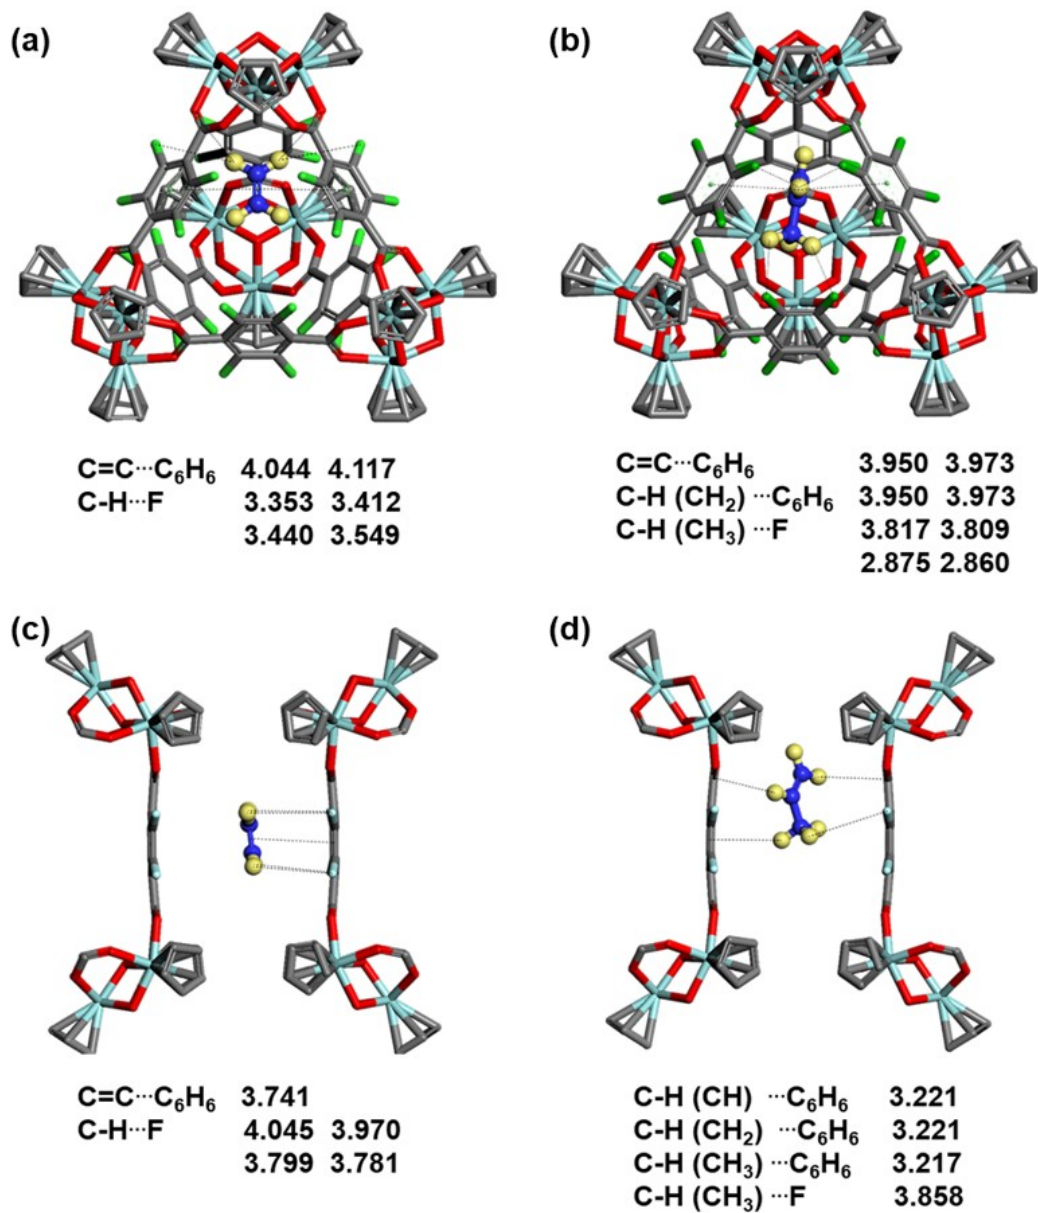

**Fig. S20** Adsorption sites for  $C_2H_4$  and  $C_3H_6$  are identified in the inner cage (a-b) and in the interstitial region between adjacent cages (c-d). The interactions of the cage and the gas molecules are depicted by dashed bonds, and the unit of distance is Å.

**Table S1.** Summary of crystal data and structure refinement parameters of NUT-107.

| Compound                                  | NUT-107                                                                                                                  |
|-------------------------------------------|--------------------------------------------------------------------------------------------------------------------------|
| CCDC number                               | 2524019                                                                                                                  |
| Empirical formula                         | C <sub>108</sub> H <sub>74</sub> Cl <sub>6</sub> F <sub>24</sub> O <sub>40</sub> Zr <sub>12</sub> ·2DMA·H <sub>2</sub> O |
| Formula weight                            | 3967.27                                                                                                                  |
| Temperature/K                             | 193.00                                                                                                                   |
| Crystal system                            | cubic                                                                                                                    |
| Space group                               | <i>Fm-3m</i>                                                                                                             |
| a/Å                                       | 37.167(3)                                                                                                                |
| b/Å                                       | 37.167(3)                                                                                                                |
| c/Å                                       | 37.167(3)                                                                                                                |
| $\alpha$ /°                               | 90                                                                                                                       |
| $\beta$ /°                                | 90                                                                                                                       |
| $\gamma$ /°                               | 90                                                                                                                       |
| Volume/Å <sup>3</sup>                     | 51342(11)                                                                                                                |
| Z                                         | 8                                                                                                                        |
| $\rho$ calc/cm <sup>3</sup>               | 1.027                                                                                                                    |
| $\mu$ /mm <sup>-1</sup>                   | 3.302                                                                                                                    |
| F(000)                                    | 15568.0                                                                                                                  |
| Crystal size/mm <sup>3</sup>              | 0.12 × 0.1 × 0.08                                                                                                        |
| Radiation                                 | GaK $\alpha$ ( $\lambda$ = 1.34139)                                                                                      |
| 2 $\theta$ range for data collection/°    | 13.592 - 104.042                                                                                                         |
| Index ranges                              | -43 ≤ h ≤ 43, -43 ≤ k ≤ 43, -43 ≤ l ≤ 43                                                                                 |
| Reflections collected                     | 126496                                                                                                                   |
| Independent reflections                   | 2184 [R <sub>int</sub> = 0.1188, R <sub>sigma</sub> = 0.0427]                                                            |
| Data/restraints/parameters                | 2184/195/180                                                                                                             |
| Goodness-of-fit on F <sup>2</sup>         | 1.082                                                                                                                    |
| Final R indexes [I ≥ 2 $\sigma$ (I)]      | R <sub>1</sub> = 0.1381, wR <sub>2</sub> = 0.2331                                                                        |
| Final R indexes [all data]                | R <sub>1</sub> = 0.1602, wR <sub>2</sub> = 0.2430                                                                        |
| Largest diff. peak/hole/e Å <sup>-3</sup> | 0.52/-0.46                                                                                                               |

**Table S2.** Selected bond lengths (Å) for NUT-107.

| <b>Atom</b> | <b>Atom</b>      | <b>Length/Å</b> | <b>Atom</b> | <b>Atom</b>      | <b>Length/Å</b> |
|-------------|------------------|-----------------|-------------|------------------|-----------------|
| Zr1         | Zr1 <sup>1</sup> | 3.337(3)        | C9          | C10 <sup>3</sup> | 1.390(11)       |
| Zr1         | Zr1 <sup>2</sup> | 3.337(3)        | C11         | C11 <sup>3</sup> | 1.389(14)       |
| Zr1         | O6               | 2.109(7)        | C11         | C10              | 1.381(13)       |
| Zr1         | O6 <sup>1</sup>  | 2.109(7)        | C2          | C7               | 1.3900          |
| Zr1         | O1               | 2.10(6)         | C2          | C3               | 1.3900          |
| Zr1         | C9               | 2.53(2)         | C7          | C6               | 1.3900          |
| Zr1         | C11              | 2.543(15)       | C7          | F6               | 1.387(8)        |
| Zr1         | C11 <sup>3</sup> | 2.543(15)       | C6          | C5               | 1.3900          |
| Zr1         | C10              | 2.509(15)       | C6          | F3               | 1.386(8)        |
| Zr1         | C10 <sup>3</sup> | 2.509(15)       | C5          | C4               | 1.3900          |
| Zr1         | O7               | 2.060(6)        | C5          | C8               | 1.496(10)       |
| Zr1         | O5               | 2.060(6)        | C4          | C3               | 1.3900          |
| O1          | C1               | 1.250(10)       | C4          | F2               | 1.385(8)        |
| C1          | C2               | 1.494(10)       | C3          | F1               | 1.384(8)        |
| C1          | O2               | 1.252(10)       | O4          | C8               | 1.252(10)       |
| C9          | C10              | 1.390(11)       | O3          | C8               | 1.249(10)       |

**Table S3.** Selected bond angles (°) for NUT-107.

| Atom             | Atom | Atom             | Angle (°) | Atom             | Atom | Atom             | Angle (°) |
|------------------|------|------------------|-----------|------------------|------|------------------|-----------|
| Zr1 <sup>1</sup> | Zr1  | Zr1 <sup>2</sup> | 60.0      | O7               | Zr1  | C10              | 152.2(3)  |
| O6 <sup>2</sup>  | Zr1  | Zr1 <sup>1</sup> | 86.4(3)   | O5               | Zr1  | Zr1 <sup>2</sup> | 35.9(2)   |
| O6               | Zr1  | Zr1 <sup>1</sup> | 37.7(2)   | O5               | Zr1  | Zr1 <sup>1</sup> | 35.9(2)   |
| O6 <sup>2</sup>  | Zr1  | Zr1 <sup>2</sup> | 37.7(2)   | O5               | Zr1  | O6               | 73.0(4)   |
| O6               | Zr1  | Zr1 <sup>2</sup> | 86.4(3)   | O5               | Zr1  | O6 <sup>2</sup>  | 73.0(4)   |
| O6               | Zr1  | O6 <sup>2</sup>  | 93.5(5)   | O5               | Zr1  | O1               | 85(2)     |
| O6               | Zr1  | C9               | 122.8(3)  | O5               | Zr1  | C9               | 153.1(6)  |
| O6 <sup>2</sup>  | Zr1  | C9               | 122.8(3)  | O5               | Zr1  | C11              | 151.7(5)  |
| O6 <sup>2</sup>  | Zr1  | C11 <sup>3</sup> | 102.5(4)  | O5               | Zr1  | C11 <sup>3</sup> | 151.7(5)  |
| O6               | Zr1  | C11 <sup>3</sup> | 79.5(4)   | O5               | Zr1  | C10              | 152.2(3)  |
| O6 <sup>2</sup>  | Zr1  | C11              | 79.5(4)   | O5               | Zr1  | C10 <sup>3</sup> | 152.2(3)  |
| O6               | Zr1  | C11              | 102.5(4)  | Zr1 <sup>1</sup> | O6   | Zr1              | 104.6(5)  |
| O6               | Zr1  | C10              | 131.7(4)  | C1               | O1   | Zr1              | 136(5)    |
| O6               | Zr1  | C10 <sup>3</sup> | 90.7(4)   | O1               | C1   | C2               | 130(3)    |
| O6 <sup>2</sup>  | Zr1  | C10              | 90.7(4)   | O1               | C1   | O2               | 123.1(14) |
| O6 <sup>2</sup>  | Zr1  | C10 <sup>3</sup> | 131.7(4)  | O2               | C1   | C2               | 107(3)    |
| O1               | Zr1  | Zr1 <sup>2</sup> | 79.0(16)  | C10 <sup>3</sup> | C9   | Zr1              | 73.3(11)  |
| O1               | Zr1  | Zr1 <sup>1</sup> | 119(2)    | C10              | C9   | Zr1              | 73.3(11)  |
| O1               | Zr1  | O6 <sup>2</sup>  | 86(2)     | C10 <sup>3</sup> | C9   | C10              | 107.9(8)  |
| O1               | Zr1  | O6               | 157(3)    | C11 <sup>3</sup> | C11  | Zr1              | 74.15(17) |
| O1               | Zr1  | C9               | 75.6(19)  | C10              | C11  | Zr1              | 72.8(10)  |
| O1               | Zr1  | C11              | 100(3)    | C10              | C11  | C11 <sup>3</sup> | 108.1(4)  |
| O1               | Zr1  | C11 <sup>3</sup> | 123(2)    | C9               | C10  | Zr1              | 74.6(11)  |
| O1               | Zr1  | C10 <sup>3</sup> | 106.9(18) | C11              | C10  | Zr1              | 75.5(10)  |
| O1               | Zr1  | C10              | 71(3)     | C11              | C10  | C9               | 107.9(6)  |
| C9               | Zr1  | Zr1 <sup>1</sup> | 149.43(8) | Zr1 <sup>1</sup> | O7   | Zr1 <sup>2</sup> | 108.1(5)  |
| C9               | Zr1  | Zr1 <sup>2</sup> | 149.43(8) | Zr1 <sup>1</sup> | O7   | Zr1              | 108.2(5)  |
| C9               | Zr1  | C11              | 52.5(4)   | Zr1 <sup>2</sup> | O7   | Zr1              | 108.1(5)  |
| C9               | Zr1  | C11 <sup>3</sup> | 52.5(4)   | Zr1 <sup>1</sup> | O5   | Zr1              | 108.2(5)  |
| C11              | Zr1  | Zr1 <sup>1</sup> | 136.9(3)  | Zr1 <sup>1</sup> | O5   | Zr1 <sup>2</sup> | 108.1(5)  |
| C11 <sup>3</sup> | Zr1  | Zr1 <sup>2</sup> | 136.9(3)  | Zr1 <sup>2</sup> | O5   | Zr1              | 108.1(5)  |
| C11              | Zr1  | Zr1 <sup>2</sup> | 117.2(3)  | C7               | C2   | C1               | 120.9(8)  |
| C11 <sup>3</sup> | Zr1  | Zr1 <sup>1</sup> | 117.2(3)  | C7               | C2   | C3               | 120.0     |
| C11              | Zr1  | C11 <sup>3</sup> | 31.7(4)   | C3               | C2   | C1               | 119.1(8)  |

---

|                  |     |                  |          |    |    |    |           |
|------------------|-----|------------------|----------|----|----|----|-----------|
| C10 <sup>3</sup> | Zr1 | Zr1 <sup>2</sup> | 168.6(3) | C6 | C7 | C2 | 120.0     |
| C10 <sup>3</sup> | Zr1 | Zr1 <sup>1</sup> | 122.2(2) | F6 | C7 | C2 | 121.0(7)  |
| C10              | Zr1 | Zr1 <sup>2</sup> | 122.2(2) | F6 | C7 | C6 | 119.0(7)  |
| C10              | Zr1 | Zr1 <sup>1</sup> | 168.6(3) | C7 | C6 | C5 | 120.0     |
| C10 <sup>3</sup> | Zr1 | C9               | 32.1(3)  | F3 | C6 | C7 | 119.1(8)  |
| C10              | Zr1 | C9               | 32.1(3)  | F3 | C6 | C5 | 120.9(8)  |
| C10              | Zr1 | C11              | 31.7(3)  | C6 | C5 | C8 | 119.6(8)  |
| C10 <sup>3</sup> | Zr1 | C11 <sup>3</sup> | 31.7(3)  | C4 | C5 | C6 | 120.0     |
| C10              | Zr1 | C11 <sup>3</sup> | 52.7(3)  | C4 | C5 | C8 | 120.4(8)  |
| C10 <sup>3</sup> | Zr1 | C11              | 52.7(3)  | C5 | C4 | C3 | 120.0     |
| C10              | Zr1 | C10 <sup>3</sup> | 53.2(5)  | F2 | C4 | C5 | 121.8(8)  |
| O7               | Zr1 | Zr1 <sup>1</sup> | 35.9(2)  | F2 | C4 | C3 | 118.2(8)  |
| O7               | Zr1 | Zr1 <sup>2</sup> | 35.9(2)  | C4 | C3 | C2 | 120.0     |
| O7               | Zr1 | O6 <sup>2</sup>  | 73.0(4)  | F1 | C3 | C2 | 120.8(7)  |
| O7               | Zr1 | O6               | 73.0(4)  | F1 | C3 | C4 | 119.2(7)  |
| O7               | Zr1 | C9               | 153.1(6) | O4 | C8 | C5 | 113(3)    |
| O7               | Zr1 | C11              | 151.7(5) | O3 | C8 | C5 | 123(3)    |
| O7               | Zr1 | C11 <sup>3</sup> | 151.7(5) | O3 | C8 | O4 | 123.3(14) |
| O7               | Zr1 | C10 <sup>3</sup> | 152.2(3) |    |    |    |           |

---

**Table S4.** Compare the separation performance of NUT-107 for C<sub>3</sub>H<sub>6</sub>/C<sub>2</sub>H<sub>4</sub> with that of previously reported materials.

| Sample                                                 | Selectivity | Separation potential ( $\Delta q$ ) | Ref.             |
|--------------------------------------------------------|-------------|-------------------------------------|------------------|
| MOF-808                                                | 3.5         | none                                | 19               |
| Cd <sub>2</sub> (AzDC) <sub>2</sub> (TPT) <sub>2</sub> | 1.2         | none                                | 20               |
| NEM-7-Cu                                               | 8.6         | 2.8                                 | 21               |
| UPC-33                                                 | 5.3         | 2.4                                 | 22               |
| Zn-BPZ-SA                                              | 4.8         | 1.9                                 | 23               |
| ZIF-8                                                  | 5.0         | none                                | 24               |
| TpDf-COF                                               | 6.1         | none                                | 25               |
| PCP 1                                                  | 3.6         | 1.5                                 | 26               |
| sr1-MOF                                                | 8.0         | 0.9                                 | 27               |
| LIFM-38                                                | 6.4         | 1.4                                 | 28               |
| Mg-MOF-74                                              | 4.7         | 3.5                                 | 29               |
| NUT-161                                                | 5.5         | 1.5                                 | 30               |
| <b>NUT-107</b>                                         | <b>7.5</b>  | <b>2.6</b>                          | <b>This work</b> |

**Table S5.** The simulated isosteric heat of adsorption for NUT-107 adsorption.

| Name    | Molecule name                 | Isosteric heat of adsorption (KJ·mol <sup>-1</sup> ) |
|---------|-------------------------------|------------------------------------------------------|
| NUT-107 | C <sub>2</sub> H <sub>4</sub> | 25.2234637908                                        |
|         | C <sub>3</sub> H <sub>6</sub> | 36.1380675105                                        |

**Table S6.** The parameters of the force field for NUT-107 and Molecules.

| Molecules                     | Pseudo Atom | $\epsilon/kb$ (K) | $\sigma$ (Å) | reference |
|-------------------------------|-------------|-------------------|--------------|-----------|
| C <sub>2</sub> H <sub>4</sub> | CH2_C2H2    | 85.000            | 3.675        | 14        |
| C <sub>3</sub> H <sub>6</sub> | CH3_C3H6    | 98.000            | 3.750        | 14        |
|                               | CH_C3H6     | 47.000            | 3.730        | 14        |
|                               | CH2_C3H6    | 85.000            | 3.675        | 14        |
|                               | NUT-107     | C                 | 52.838       | 3.431     |
|                               | H           | 22.142            | 2.571        | 13        |
|                               | O           | 30.193            | 3.118        | 13        |
|                               | Zr          | 34.720            | 2.780        | 13        |
|                               | Cl          | 114.210           | 3.520        | 13        |
|                               | F           | 25.160            | 3.000        | 13        |

## References

1. O. V. Dolomanov, Bourhis, L.J., Gildea, R.J, Howard, J.A.K. & Puschmann, H., *J. Appl. Cryst.*, 2009, 339-341.
2. A. Spek, *J. Appl. Crystallogr.*, 2003, **36**, 7-13.
3. A. L. Myers and J. M. Prausnitz, *AIChE J.*, 1965, **11**, 121-127.
4. R. Krishna, *RSC Adv.*, 2017, **7**, 35724-35737.
5. R. Krishna, *ACS Omega*, 2020, **5**, 16987-17004.
6. P. Giannozzi, O. Andreussi, T. Brumme, O. Bunau, M. Buongiorno Nardelli, M. Calandra, R. Car, C. Cavazzoni, D. Ceresoli, M. Cococcioni, N. Colonna, I. Carnimeo, A. Dal Corso, S. de Gironcoli, P. Delugas, R. A. DiStasio, A. Ferretti, A. Floris, G. Fratesi, G. Fugallo, R. Gebauer, U. Gerstmann, F. Giustino, T. Gorni, J. Jia, M. Kawamura, H. Y. Ko, A. Kokalj, E. Küçükbenli, M. Lazzeri, M. Marsili, N. Marzari, F. Mauri, N. L. Nguyen, H. V. Nguyen, A. Otero-de-la-Roza, L. Paulatto, S. Poncé, D. Rocca, R. Sabatini, B. Santra, M. Schlipf, A. P. Seitsonen, A. Smogunov, I. Timrov, T. Thonhauser, P. Umari, N. Vast, X. Wu and S. Baroni, *J. Phys.: Condens. Matter*, 2017, **29**, 465901.
7. P. Giannozzi, S. Baroni, N. Bonini, M. Calandra, R. Car, C. Cavazzoni, D. Ceresoli, G. L. Chiarotti, M. Cococcioni, I. Dabo, A. Dal Corso, S. de Gironcoli, S. Fabris, G. Fratesi, R. Gebauer, U. Gerstmann, C. Gougoussis, A. Kokalj, M. Lazzeri, L. Martin-Samos, N. Marzari, F. Mauri, R. Mazzarello, S. Paolini, A. Pasquarello, L. Paulatto, C. Sbraccia, S. Scandolo, G. Sclauzero, A. P. Seitsonen, A. Smogunov, P. Umari and R. M. Wentzcovitch, *J. Phys.: Condens. Matter*, 2009, **21**, 395502.
8. J. P. Perdew, K. Burke and M. Ernzerhof, *Phys. Rev. Lett.*, 1996, **77**, 3865-3868.
9. S. Grimme, J. Antony, S. Ehrlich and H. Krieg, *J. Chem. Phys.*, 2010, **132**.
10. H. J. Monkhorst and J. D. Pack, *Physical Review B*, 1976, **13**, 5188-5192.
11. P. E. Blöchl, O. Jepsen and O. K. Andersen, *Physical Review B*, 1994, **49**, 16223-16233.
12. D. Dubbeldam, S. Calero, D. E. Ellis and R. Q. Snurr, *Mol. Simul.*, 2016, **42**, 81-101.
13. A. K. Rappe, C. J. Casewit, K. S. Colwell, W. A. Goddard, III and W. M. Skiff, *J. Am. Chem. Soc.*, 1992, **114**, 10024-10035.
14. M. G. Martin and J. I. Siepmann, *J. Phys. Chem. B*, 1998, **102**, 2569-2577.
15. J. Delhommelle and P. MilliÉ, *Mol. Phys.*, 2001, **99**, 619-625.
16. A. Bakhshandeh and Y. Levin, *J. Chem. Phys.*, 2022, **156**.
17. D. Dubbeldam, R. Krishna and R. Q. Snurr, *J. Phys. Chem. C*, 2009, **113**, 19317-19327.
18. D. Dubbeldam, S. Calero and T. J. H. Vlugt, *Mol. Simul.*, 2018, **44**, 653-676.
19. J. Xiao, J. Ma, Z. Zhu, Y. Huang and S. Yuan, *J. Mater. Chem. A*, 2025, **13**, 26431-26440.
20. Y. Zhang, X.-Q. Meng, H.-J. Ding, X. Wang, M.-H. Yu, S.-M. Zhang, Z. Chang and X.-H. Bu, *ACS Appl. Mater. Interfaces*, 2019, **11**, 20995-21003.
21. X. Liu, C. Hao, J. Li, Y. Wang, Y. Hou, X. Li, L. Zhao, H. Zhu and W. Guo, *Inorg. Chem. Front.*, 2018, **5**, 2898-2905.
22. W. Fan, Y. Wang, Q. Zhang, A. Kirchon, Z. Xiao, L. Zhang, F. Dai, R. Wang and

- D. Sun, *Chem. Eur. J.*, 2018, **24**, 2137-2143.
23. G.-D. Wang, R. Krishna, Y.-Z. Li, Y.-Y. Ma, L. Hou, Y.-Y. Wang and Z. Zhu, *ACS Mater. Lett.*, 2023, **5**, 1091-1099.
24. W. Su, A. Zhang, Y. Sun, M. Ran and X. Wang, *J. Chem. Eng. Data*, 2017, **62**, 417-421.
25. J. Liu, X. Luo, S. Wang, P. Hao, W. Wei, J. Pan and Y. Peng, *Chem. Commun.*, 2025, **61**, 9492-9495.
26. D. Geng, M. Zhang, X. Hang, W. Xie, Y. Qin, Q. Li, Y. Bi and Z. Zheng, *Dalton Trans.*, 2018, **47**, 9008-9013.
27. H. Fang, B. Zheng, Z.-H. Zhang, H.-X. Li, D.-X. Xue and J. Bai, *Angew. Chem. Int. Ed.*, 2021, **60**, 16521-16528.
28. C.-X. Chen, Z.-W. Wei, Q.-F. Qiu, Y.-Z. Fan, C.-C. Cao, H.-P. Wang, J.-J. Jiang, D. Fenske and C.-Y. Su, *Cryst. Growth Des.*, 2017, **17**, 1476-1479.
29. Z. Bao, S. Alnemrat, L. Yu, I. Vasiliev, Q. Ren, X. Lu and S. Deng, *Langmuir*, 2011, **27**, 13554-13562.
30. G. Liu, F. Li, Z.-J. Diao, H.-D. Li, X. Wu, H.-O. Qi, L. Ding and L.-B. Sun, *J. Mater. Chem. A*, 2025, **13**, 29016-29026.
